# Supplementary material for: NusG prevents transcriptional invasion of H-NS-silenced genes
Source: PLoS Genet. 2019 Oct 7;15(10):e1008425. doi: 10.1371/journal.pgen.1008425 (PMC6797219; doi:10.1371/journal.pgen.1008425)
Supplement: S1 Table — Random lacZY transposon insertions mutants showing increased lacZ expression under NusG depletion conditions were isolated, pooled and sequenced as described in the text. (XLSX) [file pgen.1008425.s009.xlsx]

## Sheet: Sheet1
S1 Table. Translational lacZ gene fusions upregulated in NusG-depleted cells. Random lacZY transposon insertions mutants showing increased lacZ expression under NusG depletion conditions were isolated, pooled and sequenced as described in the text.
	lacZY fused to	location
1	leuO	core genome
2	ilvI	core genome
3	pipB	SPI-5
4	pipC	SPI-5
5	sopB	SPI-5
6	pagC	SPI-11
7	ssrB	SPI-2
8	ssaC	SPI-2
9	sseA	SPI-2
10	sseB	SPI-2
11	sseC	SPI-2
12	sseE	SPI-2
13	ssaL	SPI-2
14	yncC	core genome
15	steB	Unnamed island
16	dalS	Unnamed island
17	sopE2	CS 40 island
18	pagO	CS 40 Island
19	sopA	Unnamed islet
20	udg	core genome
21	STM2234	SPI-12
22	sseL	Unnamed islet
23	pipB2	Unnamed islet
24	virK	Unnamed islet
25	avrA	SPI-1
26	sprB	SPI-1
27	hilC	SPI-1
28	prgJ	SPI-1
29	hilA	SPI-1
30	sptP	SPI-1
31	sipA	SPI-1
32	sipC	SPI-1
33	sipB	SPI-1
34	invB	SPI-1
35	invA	SPI-1
36	invG	SPI-1
37	mgtB	SPI-3
38	STM4196	Unnamed island
39	siiE	SPI-4
40	STM4315	Unnamed islet
